# Supplementary material
Source: PubMed Central journal article supplement (PMC5860173)
Supplement: btx452_s2.pdf [file btx452_s2.pdf]

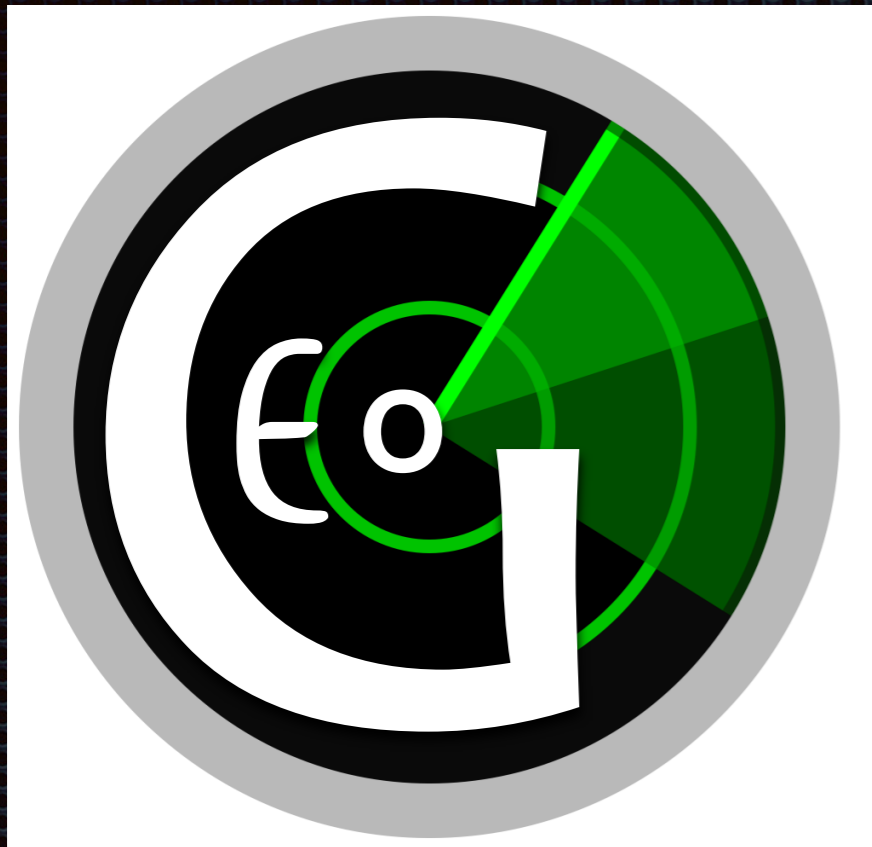

# ScanGEO

parallel mining of high-throughput gene expression data

*Katja Koepfen, Bruce A. Stanton, Thomas H. Hampton  
The Geisel School of Medicine at Dartmouth*

User Guide for ScanGEO Shiny App

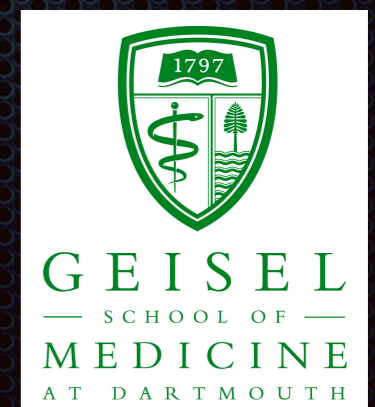

# ScanGEO Highlights

- ✦ A simple, user friendly Shiny app that searches for differentially expressed genes across multiple NCBI gene expression omnibus (GEO) data sets
- ✦ Search can be limited to a particular keyword
- ✦ Uses a custom list of genes and/or a KEGG pathway to be tested for differential gene expression
- ✦ Outputs include summary tables of all selected GEO data sets, significant genes and studies, PDF files with plots of differentially expressed genes, and CSV files with expression values, greatest fold-change and p-values

# ScanGEO App Flowchart

Select organism

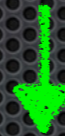

Enter keyword

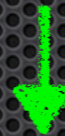

Specify genes and/or KEGG pathway

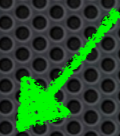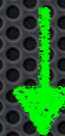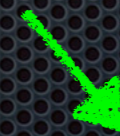

Summary tables  
with # of significant  
genes and studies

PDF files with dot  
plots of significant  
genes

CSV files with  
expression values,  
p-values & max FC

# Step 1 - Select Studies

1. Select organism →

2. Enter keyword  
(optional, limited  
to one search term) →

3. Find matching  
data sets →

The screenshot shows a web interface with four tabs: 'Select Studies', 'KEGG Pathway', 'Custom Genes', and 'Scan'. The 'Select Studies' tab is active. Below the tabs, there is a form with the following elements:

- Organism:** A dropdown menu with 'Homo' selected.
- Additional search term:** A text input field containing 'cystic fibrosis'.
- Instructions:** A paragraph of text: 'Select an organism, enter one optional search term and push the button below to find relevant GEO data sets.'
- Button:** A blue button with a question mark icon and the text 'Find GEO data sets'.

# Step 2 - Obtain Table with Relevant Studies

Select Studies   KEGG Pathway   Custom Genes   Scan

**Organism:**

Homo

**Additional search term:**

cystic fibrosis

Select an organism, enter one optional search term and push the button below to find relevant GEO data sets.

[Find GEO data sets](#)

8 studies found searching for "cystic fibrosis" in Homo

Number of studies that match a given organism and search term. If 0, try modifying the search term.

Table   Significant Genes   Significant Studies   Documentation

Show 25 entries

| title                                                                                               | gds     | pubmed_id | type                          | platform_organism | update_date |
|-----------------------------------------------------------------------------------------------------|---------|-----------|-------------------------------|-------------------|-------------|
| Cystic fibrosis pathology and 4-phenylbutyrate (HG-U133A)                                           | GDS493  | 14583596  | Expression profiling by array | Homo sapiens      | 2003-12-04  |
| Cystic fibrosis pathology and 4-phenylbutyrate (HG-U133B)                                           | GDS494  | 14583596  | Expression profiling by array | Homo sapiens      | 2003-12-04  |
| Lung pneumocyte response to Pseudomonas aeruginosa type III secretion system mutants                | GDS1022 | 16207250  | Expression profiling by array | Homo sapiens      | 2005-02-08  |
| Cystic fibrosis patients with mild and severe lung disease: nasal respiratory epithelium (HG-U133A) | GDS2142 | 16614352  | Expression profiling by array | Homo sapiens      | 2007-03-14  |
| Cystic fibrosis patients with mild and severe lung disease: nasal respiratory epithelium (HG-U133B) | GDS2143 | 16614352  | Expression profiling by array | Homo sapiens      | 2007-03-14  |
| Cystic fibrosis bronchial epithelial cells exposure to Pseudomonas aeruginosa PA01 biofilms         | GDS4252 | 22821996  | Expression profiling by array | Homo sapiens      | 2013-04-23  |
| Cystic fibrosis transmembrane conductance regulator expression in airway epithelial cells           | GDS4255 | 22853952  | Expression profiling by array | Homo sapiens      | 2013-04-23  |
| Cystic fibrosis: rectal epithelia                                                                   | GDS4844 | 24105369  | Expression profiling by array | Homo sapiens      | 2014-05-22  |

Showing 1 to 8 of 8 entries

# Step 3 - Select KEGG Pathway

Selection of an organism-specific KEGG pathway is optional.

All genes on a given KEGG pathway can be included instead of or in addition to custom genes.

Select Studies   KEGG Pathway   Custom Genes   Scan

Select KEGG pathway

Staphylococcus aureus infection ▲

- Signaling pathways regulating pluripotency of stem cells
- Small cell lung cancer
- SNARE interactions in vesicular transport
- Sphingolipid metabolism
- Sphingolipid signaling pathway
- Spliceosome
- Staphylococcus aureus infection

# Step 4 - Select Custom Genes

Select genes  
(pull-down menu  
with choices appears  
as you start typing)

Wildcard  
search

File upload

Select Studies KEGG Pathway Custom Genes Scan

Enter gene symbols

CFTR MUC1

Multiple genes can be selected. Start typing a gene symbol, then select genes from the pulldown menu so that they appear in a grey box.

Wildcard search (e.g. all genes starting with 'MIR' or 'LINC')

IL

91 gene symbols found searching for genes starting with " IL " in Homo

Wildcard search selects all gene symbols starting with the specified characters.

Upload CSV file (limit = 200 gene symbols)

Browse... No file selected

CSV file with a maximum of 200 species-specific gene symbols in the first column can be uploaded.

# Step 5 - Scan Selected Genes

1. Select alpha

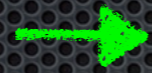

2. Scan GEO studies for differential expression of selected genes

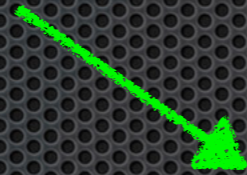

3. A progress bar appears in the lower right while scan is running

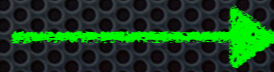

Select Studies   KEGG Pathway   Custom Genes   **Scan**

**Significance level alpha**

- 0.05
- 0.01
- 0.001

Only comparisons below the selected alpha level will be considered significant.

Chose a significance level and press 'ScanGEO'. If significant genes are found, pdf plots and csv files can be downloaded with the 'Download results' button once the scan is complete.

Estimated scan time: 0.3 minutes

Scan time depends on many factors and estimates may not be accurate.

ScanGEO

Scanning GEO data base



# Step 6a - View Results

Summary table with number of studies in which a gene of interest was differentially expressed

Table **Significant Genes** Significant Studies Documentation

Show 10 entries Search:

| Gene    | Significant.Studies |
|---------|---------------------|
| IL1RN   | 5                   |
| IL4R    | 5                   |
| IL6ST   | 5                   |
| CFD     | 3                   |
| DSG1    | 3                   |
| CFH     | 3                   |
| HLA-DMA | 3                   |
| KRT10   | 3                   |
| PTAFR   | 3                   |
| CFB     | 3                   |

Gene  Significant.Studies

Showing 1 to 10 of 148 entries

Previous **1** 2 3 4 5 ... 15

Next

# Step 6b - View Results

Summary table with number of genes that were differentially expressed in each study of interest

Table   Significant Genes   **Significant Studies**   Documentation

Show 25 entries   Search:

| Title                                                                                               | GDS                     | Significant_Genes |
|-----------------------------------------------------------------------------------------------------|-------------------------|-------------------|
| Cystic fibrosis bronchial epithelial cells exposure to Pseudomonas aeruginosa PA01 biofilms         | <a href="#">GDS4252</a> | 45                |
| Cystic fibrosis patients with mild and severe lung disease: nasal respiratory epithelium (HG-U133A) | <a href="#">GDS2142</a> | 30                |
| Lung pneumocyte response to Pseudomonas aeruginosa type III secretion system mutants                | <a href="#">GDS1022</a> | 20                |
| Cystic fibrosis transmembrane conductance regulator expression in airway epithelial cells           | <a href="#">GDS4255</a> | 20                |
| Cystic fibrosis: rectal epithelia                                                                   | <a href="#">GDS4844</a> | 17                |
| Cystic fibrosis pathology and 4-phenylbutyrate (HG-U133A)                                           | <a href="#">GDS493</a>  | 12                |
| Cystic fibrosis patients with mild and severe lung disease: nasal respiratory epithelium (HG-U133B) | <a href="#">GDS2143</a> | 5                 |
| Cystic fibrosis pathology and 4-phenylbutyrate (HG-U133B)                                           | <a href="#">GDS494</a>  | 1                 |

Title    GDS    Significant\_Genes

Showing 1 to 8 of 8 entries   Previous **1** Next

# Step 7 - Download Results

Download all scan results as a ZIP file →

Reset analysis settings to begin a new search →

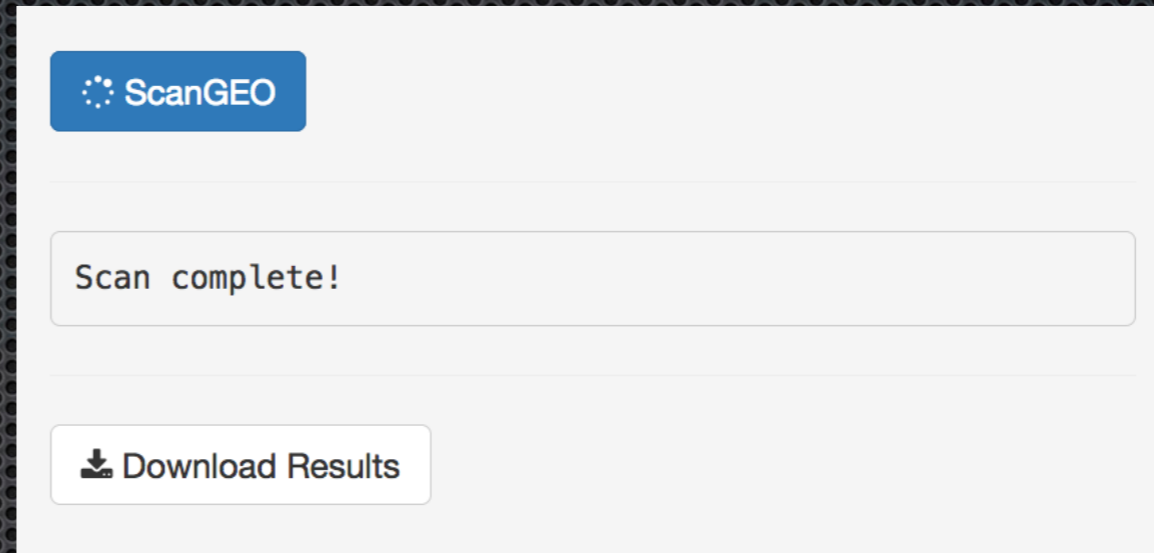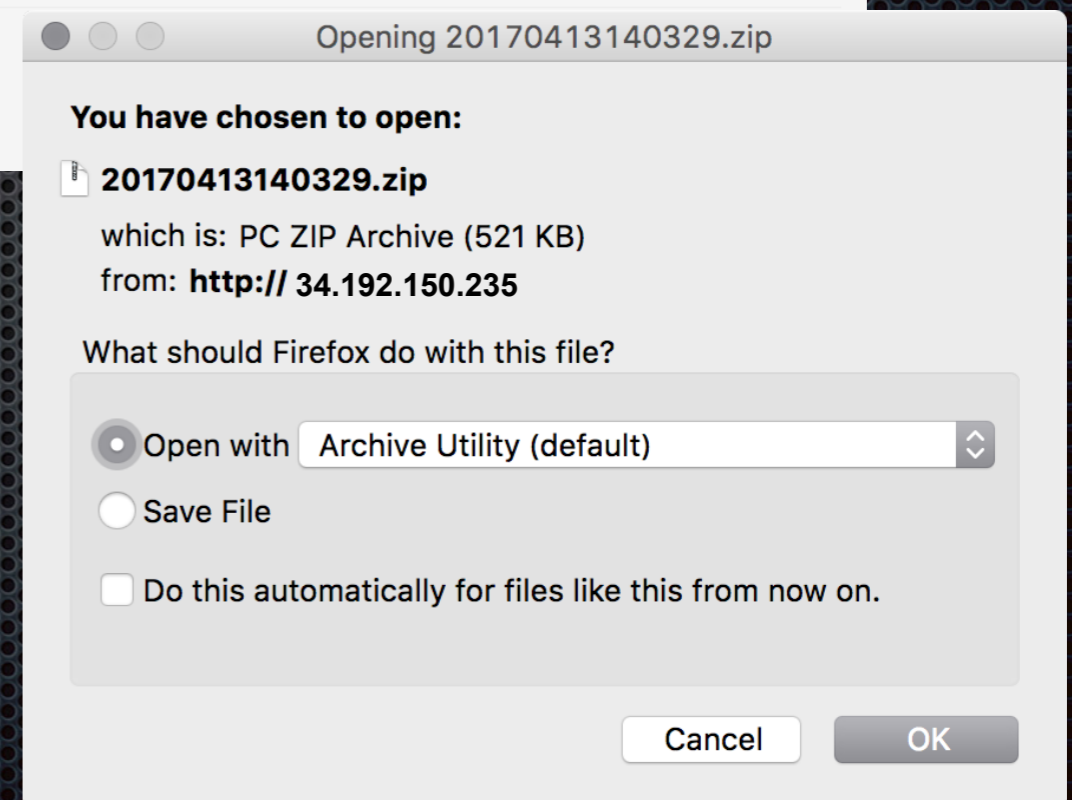

# Output Files

## **01\_README.pdf**

02\_Summary\_Table\_organism.csv: GDS summary table for selected organism and keyword.

03\_Results\_sig\_genes.csv: Summary table with number of significant studies per gene.

04\_Results\_sig\_studies.csv: Summary table with number of significant genes per study.

05\_pValues\_summary.csv: Unadjusted p-values for all mapped genes in studies with at least two samples per group. For genes with multiple probes the lowest p-value is shown. NA = gene was not mapped to a GDS or GDS had fewer than 2 Ns per group.

06\_max\_log2FC\_summary.csv: Summary of largest absolute log2 fold change between the experimental groups for a mapped gene in a study with at least two samples per group. NA = gene was not mapped to a GDS or GDS had fewer than 2 Ns per group.

PDF files: Dot plots for probes that reached significance in ANOVA based on user-specified alpha level (default = 0.05). Red lines = mean.

CSV files: Expression values that were used to generate dot plots for significant probes.

# Example Output Plot

Study title

Cystic fibrosis patients with mild and severe lung disease: nasal respiratory epithelium (HG-U133A)

IL10.207433\_at.GDS2142.pdf : P = 0.037

Gene Probe GDS p-value

IL10 RNA Expression (log2)

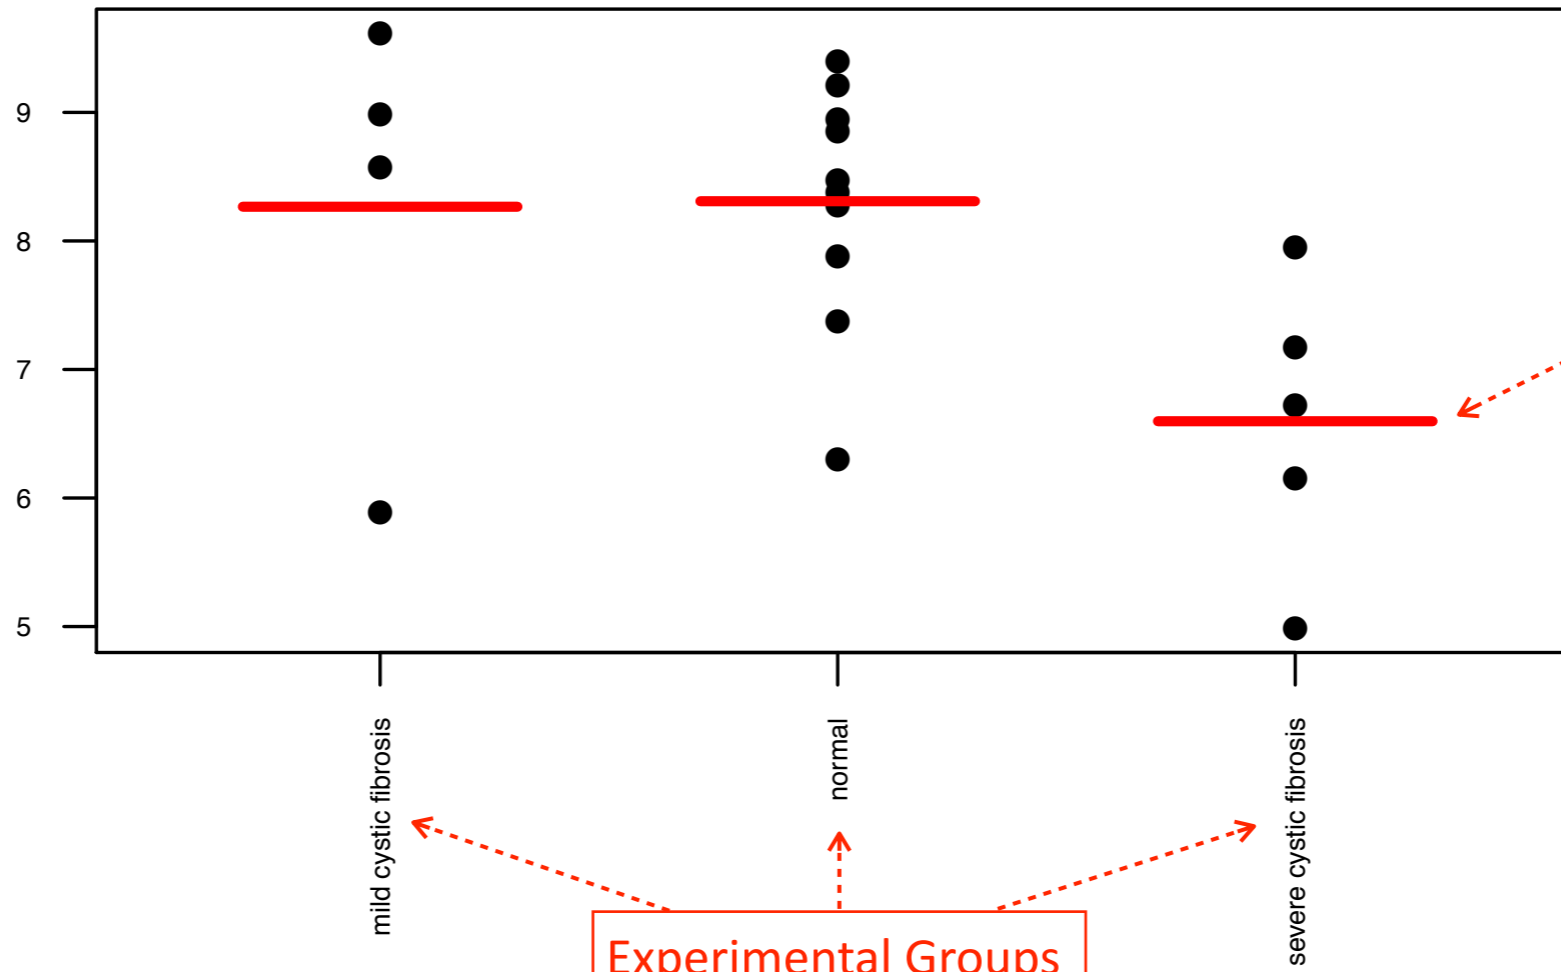

Mean

Gene

Experimental Groups

# Status Messages

Select Studies   KEGG Pathway   Custom Genes   Scan

**Significance level alpha**

0.05  
 0.01  
 0.001

Chose a significance level and press 'ScanGEO'. If significant genes are found, pdf plots and csv files can be downloaded with the 'Download results' button once the scan is complete.

No genes selected

Make sure to select at least one gene or a KEGG pathway.

Scan complete!

At least one of the selected genes was differentially expressed and there are downloadable results.

No significant genes!

The selected genes were not differentially expressed in any of the selected studies at the chosen alpha level.

# Acknowledgements

- John Wallace (Dartmouth Research Computing)
- Dean Attali
- Funding sources:

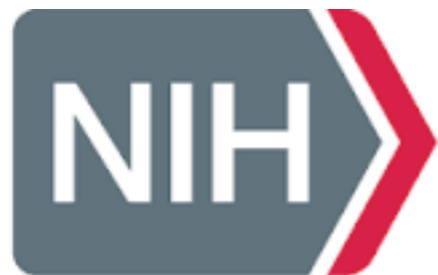

National Heart, Lung,  
and Blood Institute

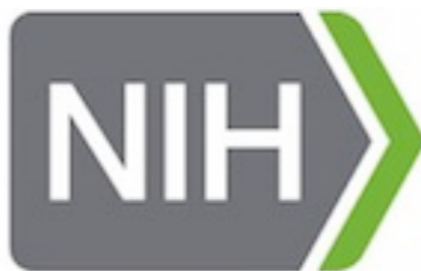

National Institute of  
Environmental Health Sciences

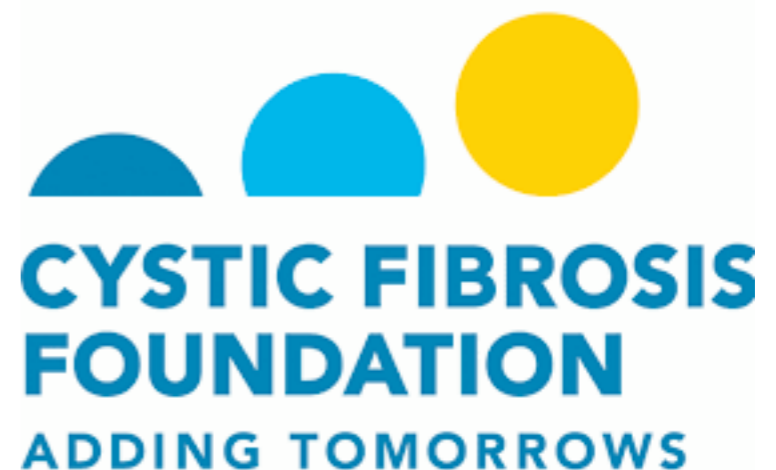

Contact: [Katja.Koeppen@Dartmouth.edu](mailto:Katja.Koeppen@Dartmouth.edu)
